# Supplementary material for: Novel ultrasound neuromodulation therapy with transcranial pulse stimulation (TPS) in Parkinson’s disease: a first retrospective analysis
Source: Springer Nature journal article supplement (doi:10.1007/s00415-023-12114-1), 2023-11-30
Supplement: MOESM1 [file 26473760]

## Supplementary Information

**Table S1: Individual treatment settings and TPS parameter adjustments**

| ID  | Number of TPS sessions | Pulse repetition frequency (Hz) | Deviations from the standard pulse count | Deviations from the standard energy flux density                                | Days between UPDRS (pre) and first TPS session | Days between last TPS session and UPDRS (post) |
|-----|------------------------|---------------------------------|------------------------------------------|---------------------------------------------------------------------------------|------------------------------------------------|------------------------------------------------|
| P01 | 10                     | 4                               | none                                     | none                                                                            | 6                                              | 6                                              |
| P02 | 10                     | 4                               | none                                     | 2x double stim <sup>1</sup> with 0.2 mJ/mm <sup>2</sup>                         | 0                                              | 0                                              |
| P03 | 10                     | 4                               | none                                     | none                                                                            | 0                                              | 0                                              |
| P04 | 10                     | 4                               | none                                     | none                                                                            | 14                                             | 61                                             |
| P05 | 10                     | 4                               | none                                     | none                                                                            | 5                                              | 25                                             |
| P06 | 10                     | 4                               | none                                     | 1x double stim <sup>1</sup> with 0.2 mJ/mm <sup>2</sup>                         | 21                                             | 18                                             |
| P07 | 10                     | 4                               | none                                     | none                                                                            | 49                                             | 3                                              |
| P08 | 10                     | 4                               | none                                     | 1x double stim <sup>1</sup> with 0.2 mJ/mm <sup>2</sup>                         | 7                                              | 6                                              |
| P09 | 10                     | 4                               | none                                     | none                                                                            | 0                                              | 10                                             |
| P10 | 10                     | 4                               | first TPS session with 2000 pulses       | 1x double stim <sup>1</sup> with 0.2 mJ/mm <sup>2</sup>                         | 0                                              | 0                                              |
| P11 | 10                     | 4                               | first TPS session with 2000 pulses       | none                                                                            | 26                                             | 12                                             |
| P12 | 10                     | 4                               | first TPS session with 2000 pulses       | none                                                                            | 18                                             | 6                                              |
| P13 | 10                     | 4                               | first TPS session with 2000 pulses       | none                                                                            | 10                                             | 4                                              |
| P14 | 10                     | 4                               | first TPS session with 2000 pulses       | 8 sessions with 0.2 mJ/mm <sup>2</sup> ; 2 sessions with 0.1 mJ/mm <sup>2</sup> | 17                                             | 21                                             |
| P15 | 10                     | 4                               | first TPS session with 2000 pulses       | 2x double stim <sup>1</sup> with 0.2 mJ/mm <sup>2</sup>                         | 2                                              | 0                                              |
| P16 | 10                     | 4                               | none                                     | 1x double stim <sup>1</sup> with 0.2 mJ/mm <sup>2</sup>                         | 14                                             | 11                                             |
| P17 | 10                     | 4                               | none                                     | 1x double stim <sup>1</sup> with 0.2 mJ/mm <sup>2</sup>                         | 26                                             | 22                                             |
| P18 | 10                     | 4                               | first TPS session with 2000 pulses       | 1x double stim <sup>1</sup> with 0.2 mJ/mm <sup>2</sup>                         | 34                                             | 18                                             |
| P19 | 10                     | 4                               | first TPS session with 2000 pulses       | none                                                                            | 8                                              | 9                                              |
| P20 | 10                     | 4                               | first TPS session with 2000 pulses       | 1x double stim <sup>1</sup> with 0.2 mJ/mm <sup>2</sup>                         | 24                                             | 21                                             |

<sup>1</sup> Double stim refers to the administration of two TPS sessions in a single day, as outlined in the Methods.

**Table S2: List of patient comorbidities**

| ID  | Diagnosis | Comorbidities                                                                                                                                                                                                                                        |
|-----|-----------|------------------------------------------------------------------------------------------------------------------------------------------------------------------------------------------------------------------------------------------------------|
| P01 | PD        | Arterial hypertension                                                                                                                                                                                                                                |
| P02 | PD        | /                                                                                                                                                                                                                                                    |
| P03 | PD        | Alzheimer's Disease                                                                                                                                                                                                                                  |
| P04 | PD        | /                                                                                                                                                                                                                                                    |
| P05 | PD        | Bilateral presbycusis with hearing aids, Glaucoma                                                                                                                                                                                                    |
| P06 | PD        | /                                                                                                                                                                                                                                                    |
| P07 | PD        | Arterial hypertension, Supraventricular extrasystoles, Multinodular Goiter, Chronic bronchitis                                                                                                                                                       |
| P08 | PD        | Hypercholesterolemia, Mild organic mental disorder                                                                                                                                                                                                   |
| P09 | PD        | Frontoparietal atrophy, Migraine, Nerve root compression L3/L4, Sudeck's atrophy                                                                                                                                                                     |
| P10 | PD        | /                                                                                                                                                                                                                                                    |
| P11 | PD        | Mild restless leg syndrome, Mild atherosclerotic macroangiopathy of the carotids, S1 root irritation                                                                                                                                                 |
| P12 | PD        | Dementia syndrome, Anxiety disorder and moderate depressive episode, Nodular goiter, Epiphyseal cyst                                                                                                                                                 |
| P13 | PD        | Hypercholesterolemia                                                                                                                                                                                                                                 |
| P14 | PD        | Orthostatic dysregulation, Hyperthyroidism, Chronic obstructive pulmonary disease, stage I, Depressive episodes                                                                                                                                      |
| P15 | PD        | Mild frontal lobe syndrome, Orthostatic hypertension, Lumbar spinal canal stenosis at L4/L5, Hypacusis, Mild polyneuropathy                                                                                                                          |
| P16 | PD        | /                                                                                                                                                                                                                                                    |
| P17 | PD        | Supra-aortic sclerosis with thickening of the intima media, Supratentorial subcortical lesions, Mild osteochondrosis C5/C6, C5/C6 Disk bulging, Retrospondylophytes, Constriction of the neuroforamina, Mild constriction of the neuroforamina C6/C7 |
| P18 | PD        | /                                                                                                                                                                                                                                                    |
| P19 | PD        | Neurodegeneration with brain iron accumulation                                                                                                                                                                                                       |
| P20 | PD        | Arterial hypertension                                                                                                                                                                                                                                |
